# Supplementary material
Source: PubMed Central journal article supplement (PMC7773222)
Supplement: NIHMS1650598-supplement-Figure_S1.pdf [file NIHMS1650598-supplement-Figure_S1.pdf]

Figure S1

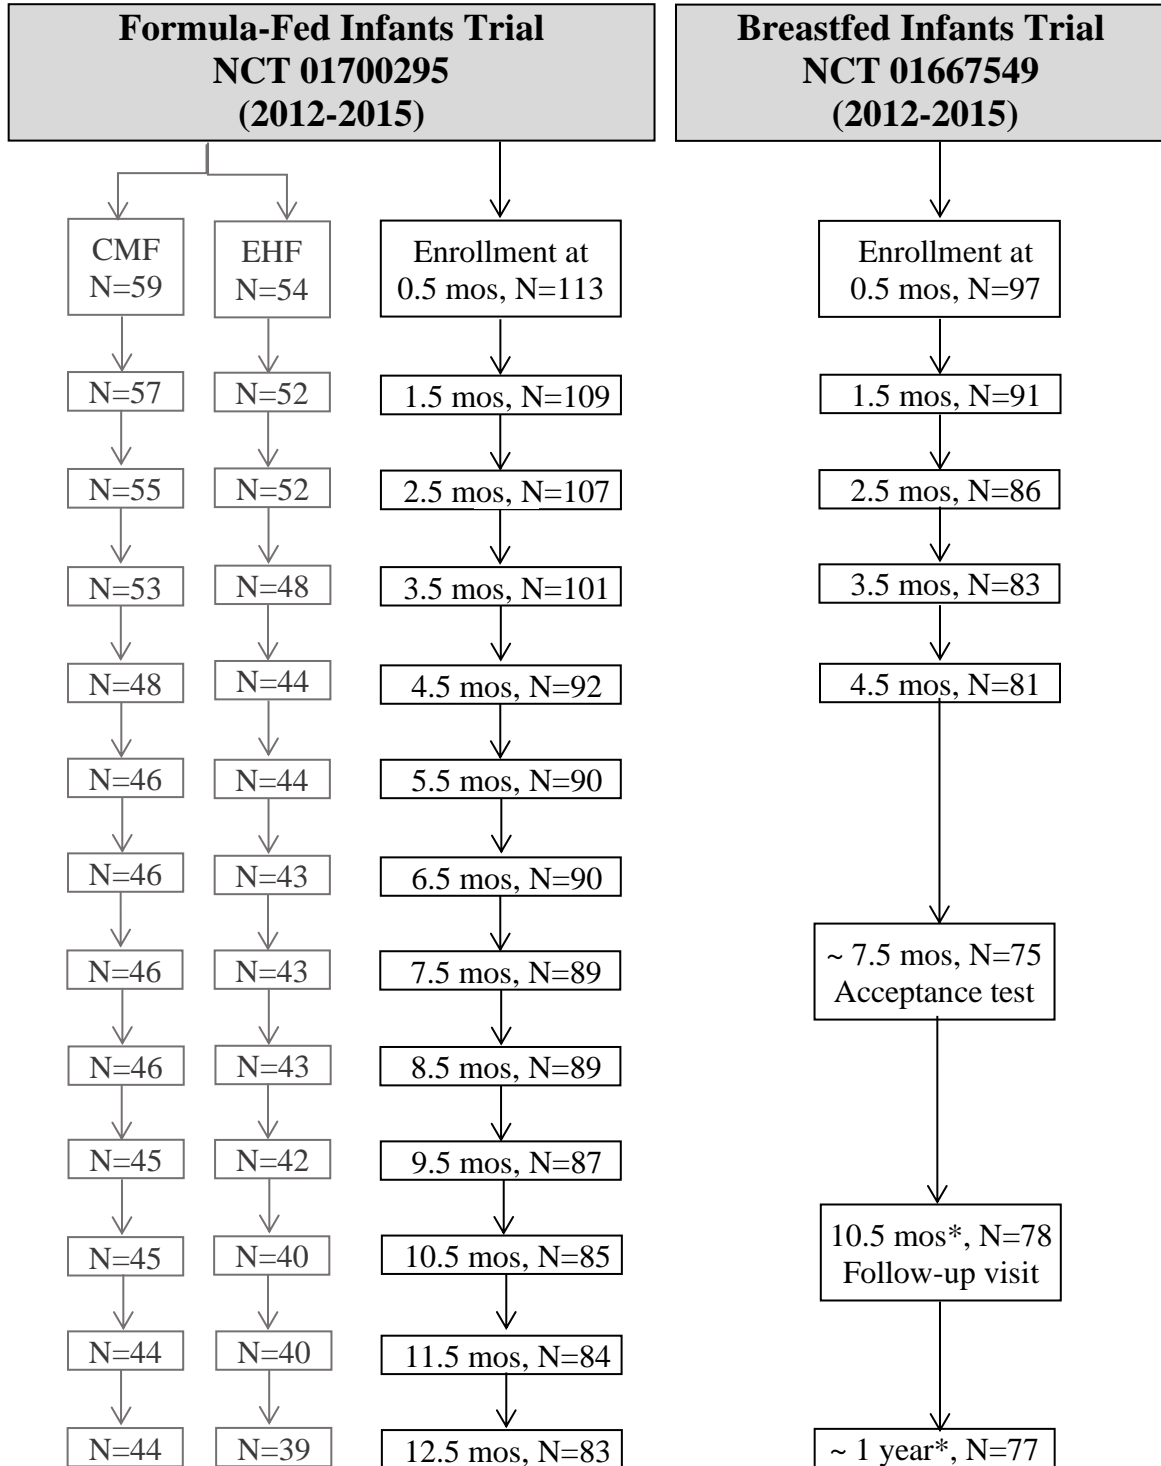

\*Dyads in the breastfeeding trial who did not complete the primary outcome visit (acceptance test at 7.5 months) returned for the follow-up visit at 10.5 months (N=3) and ~1 year (11.5-15.5 months; N=2).
